# Supplementary material for: Two-dimensional molecular brush-functionalized porous bilayer composite separators toward ultrastable high-current density lithium metal anodes
Source: PubMed Central journal article supplement (PMC6433896; doi:10.1038/s41467-019-09211-z), 2019-03-25
Supplement: 41467_2019_9211_MOESM1_ESM.pdf [file 41467_2019_9211_MOESM1_ESM.pdf]

# Supplementary Information

---

**Two-dimensional molecular brush-functionalized porous bilayer composite  
separators toward ultrastable high-current density lithium metal anodes**

Li et al.

## Supplementary Figures

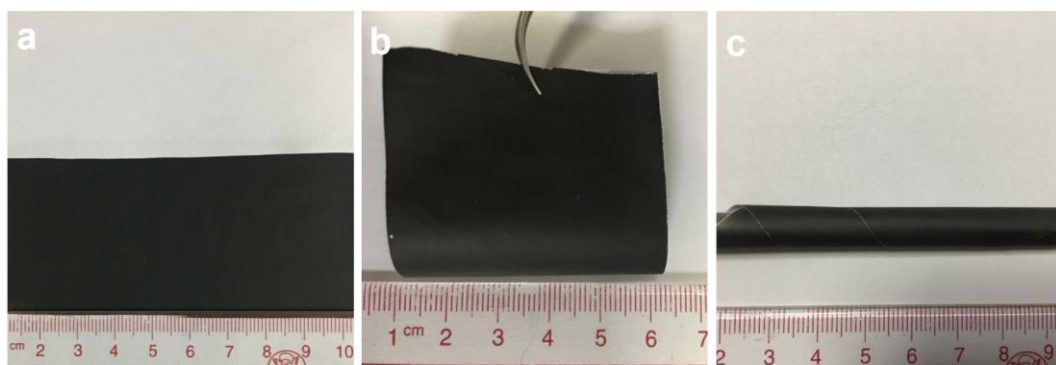

**Supplementary Figure 1 | Photographs of the GO-g-PAM@PP separator.** (a) Unfolded, (b) bent, and (c) rolled.

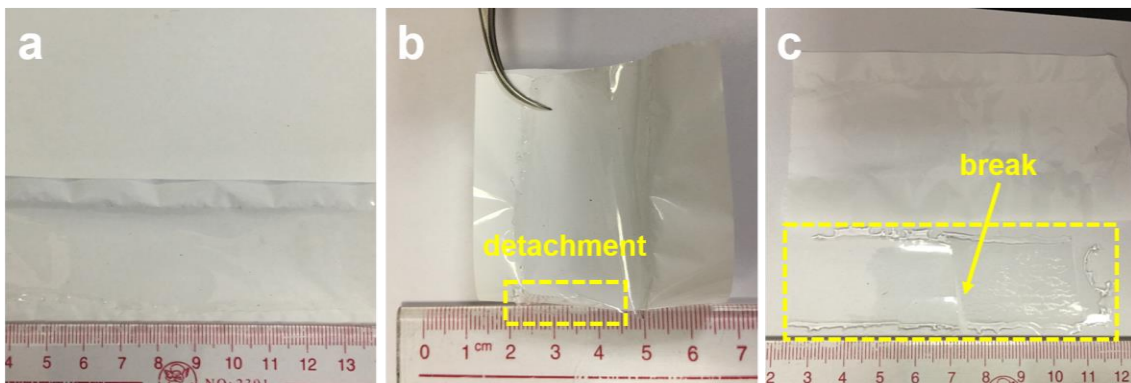

**Supplementary Figure 2 | Photographs of the PAM@PP separator.** Detachment and break of the PAM coating can be observed.

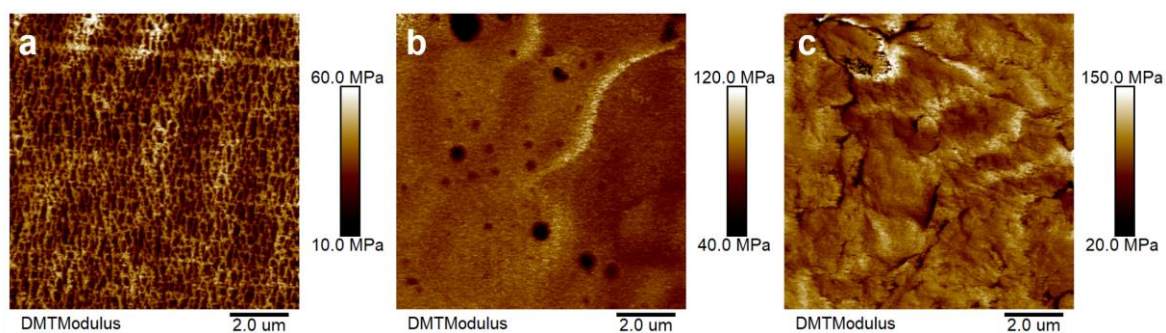

**Supplementary Figure 3 | Mechanical strength of different separators.** AFM Young's modulus mappings of (a) PP, (b) PAM@PP, and (c) GO-*g*-PAM@PP separators. The PAM@PP and GO-*g*-PAM@PP separators were tested on the surfaces of their PAM and GO-*g*-PAM coatings, respectively.

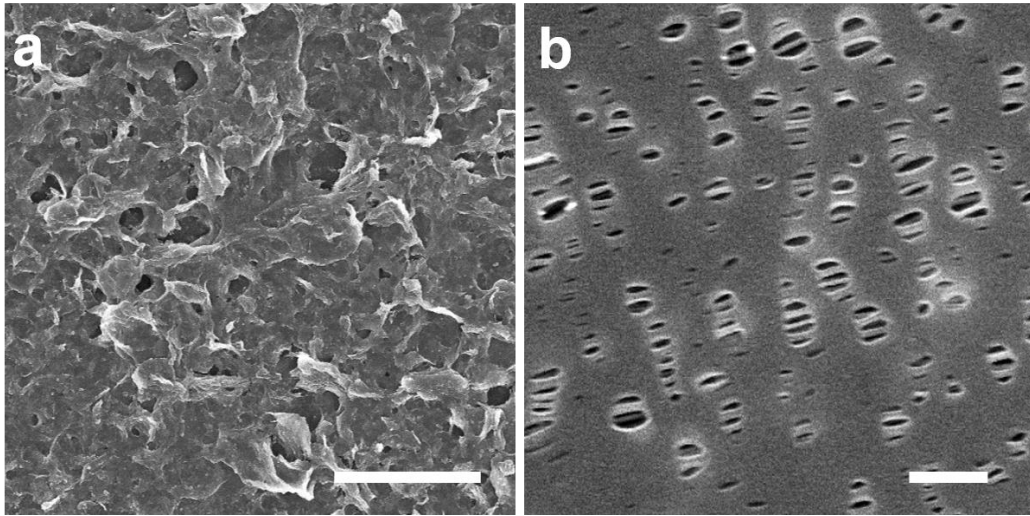

**Supplementary Figure 4 | SEM images of the (a) coated and (b) uncoated side of the GO-g-PAM@PP separator. Scale bars, (a) 20  $\mu\text{m}$  and (b) 500 nm.**

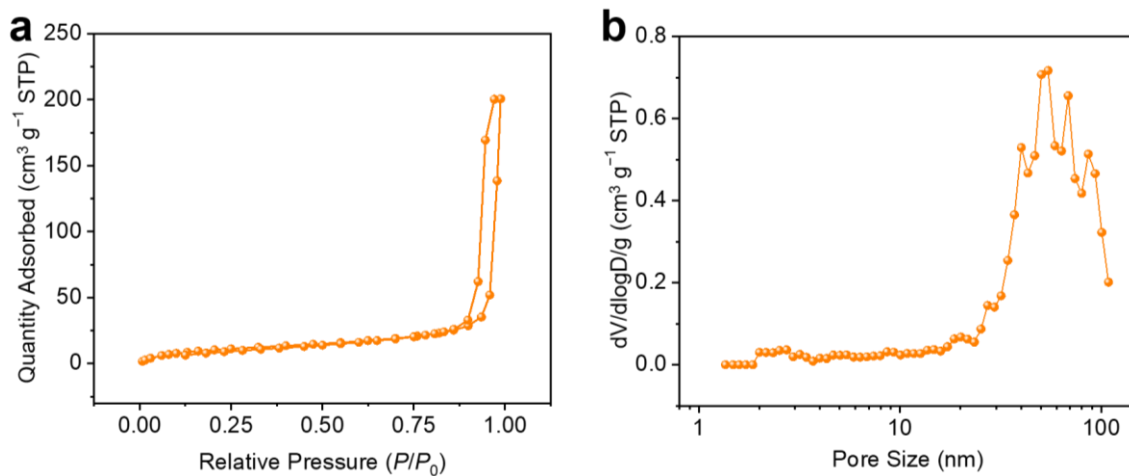

**Supplementary Figure 5 | Porous structure of the GO-g-PAM@PP separator.** (a) N<sub>2</sub> adsorption-desorption isotherm and (b) pore size distribution curve of GO-g-PAM@PP separator.

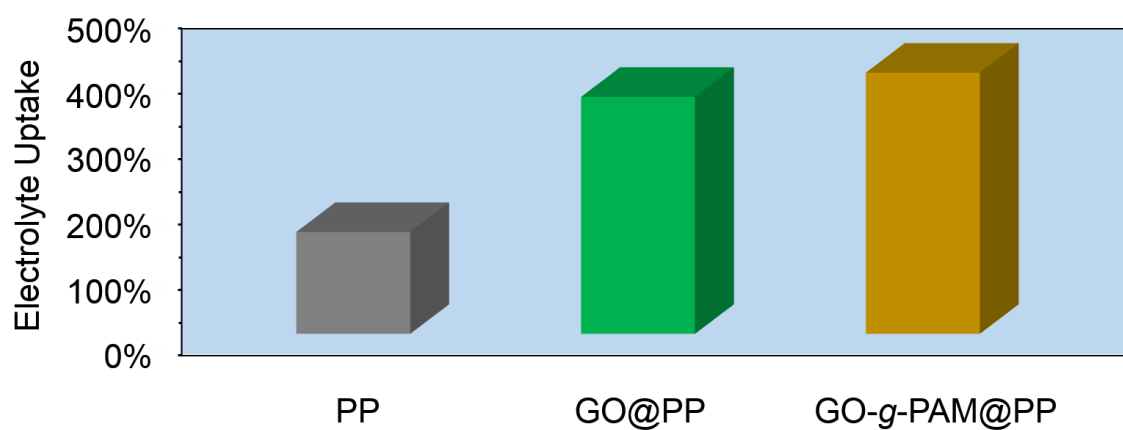

**Supplementary Figure 6 | Electrolyte uptake abilities of the PP, GO@PP, and GO-g-PAM@PP separators.**

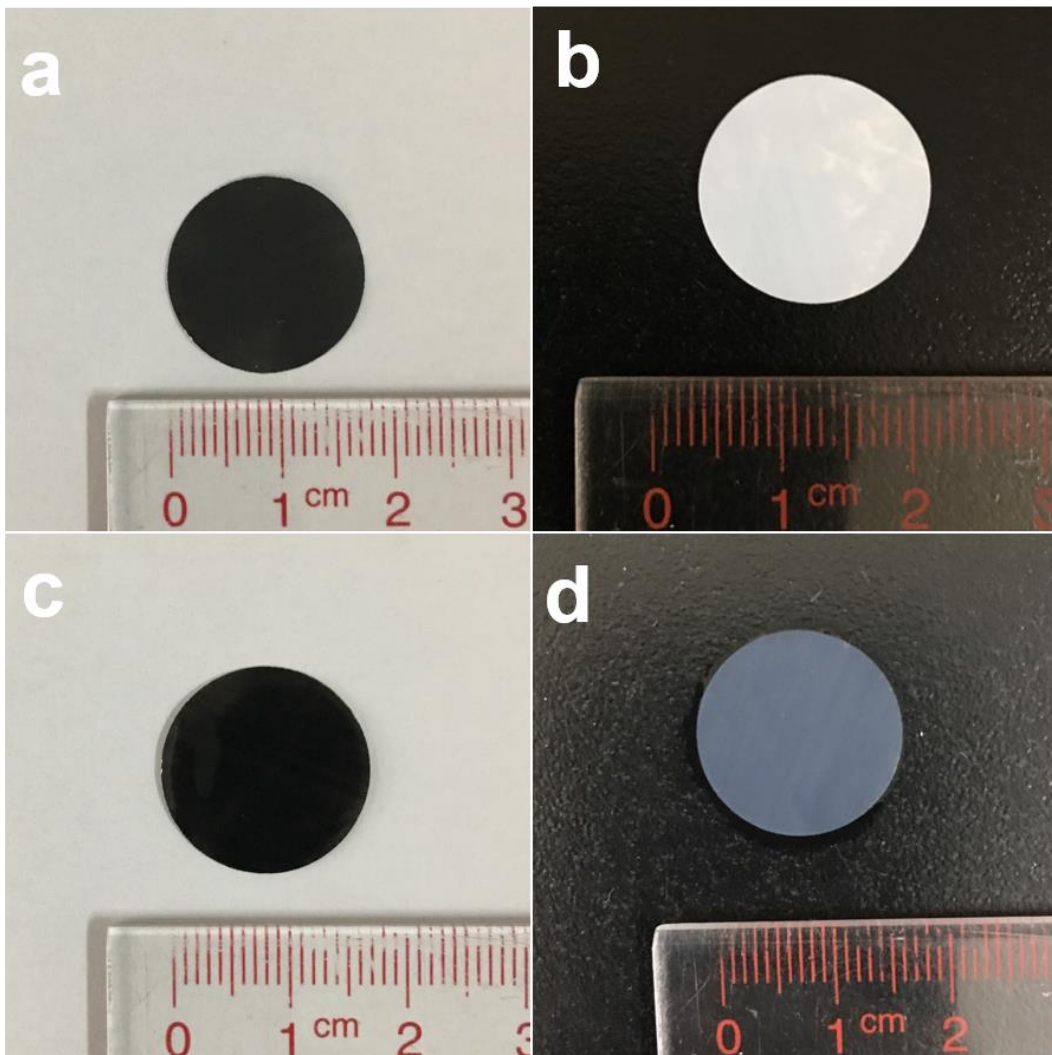

**Supplementary Figure 7 | Digital photographs of the GO-g-PAM@PP separator. (a, c)** Coated and (b, d) uncoated side of the GO-g-PAM@PP separator (a, b) before and (c, d) after dropping electrolyte onto the GO-g-PAM coating.



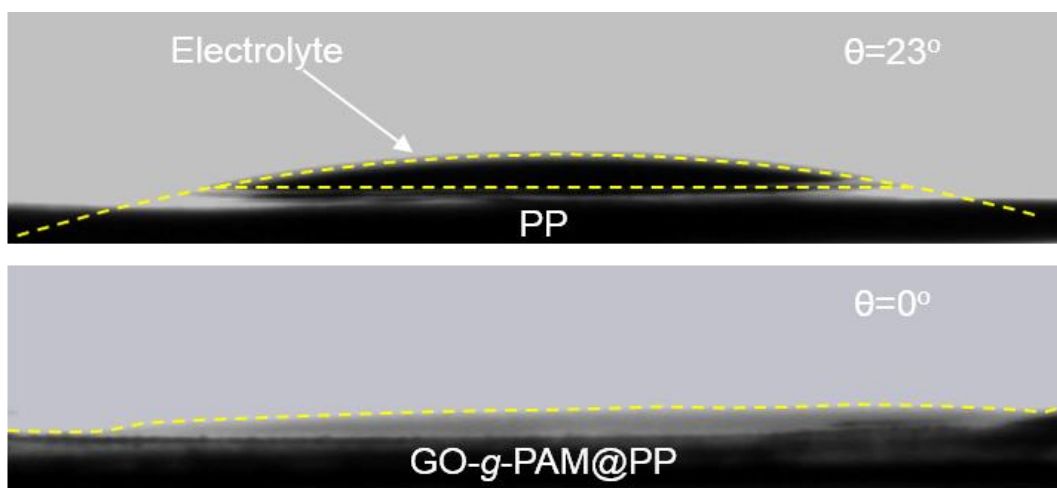

**Supplementary Figure 8 | Contact angle of electrolyte on the PP and GO-g-PAM@PP separators.**

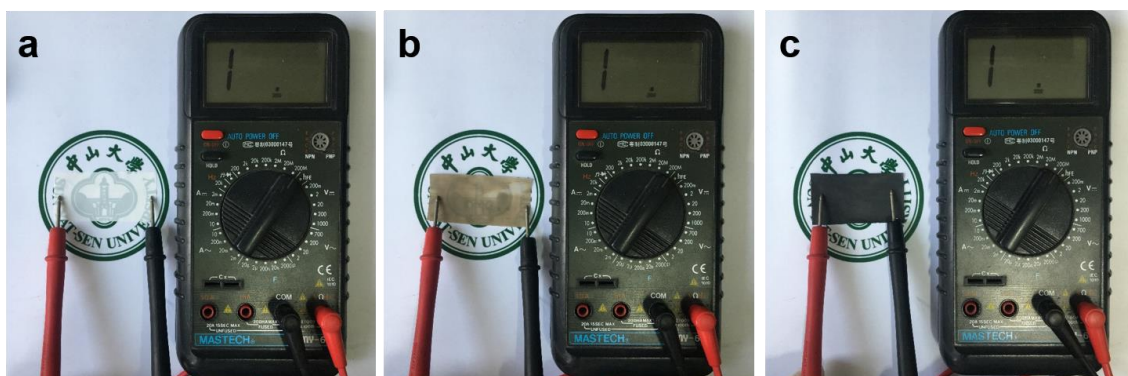

**Supplementary Figure 9 | Electrical conductivity of different separators.** Electrical conductivity measurements for (a) PP, (b) GO@PP, and (c) GO-g-PAM@PP separators by a multimeter within a measurement range of 0-200 MΩ, suggesting their electrically insulated features.

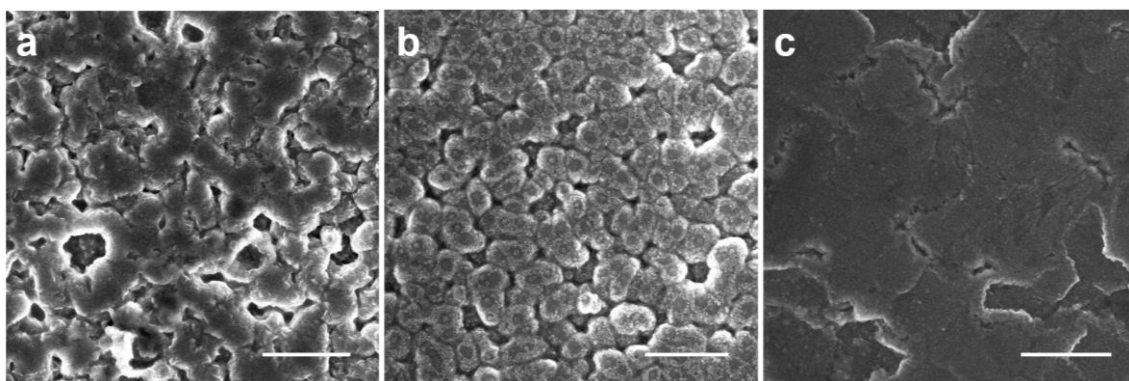

**Supplementary Figure 10 | SEM images of Li deposited on Cu foils with (a) PP, (b) GO@PP, and (c) GO-g-PAM@PP separators. The scale bars are 10  $\mu\text{m}$ .**

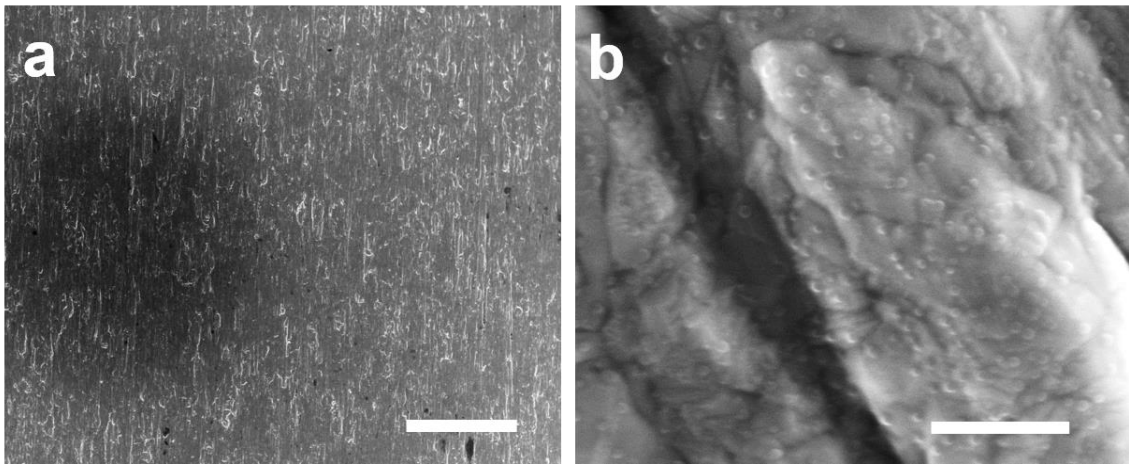

**Supplementary Figure 11 | SEM images of Cu foils. Scale bars, (a) 50  $\mu\text{m}$  and (b) 500 nm.**

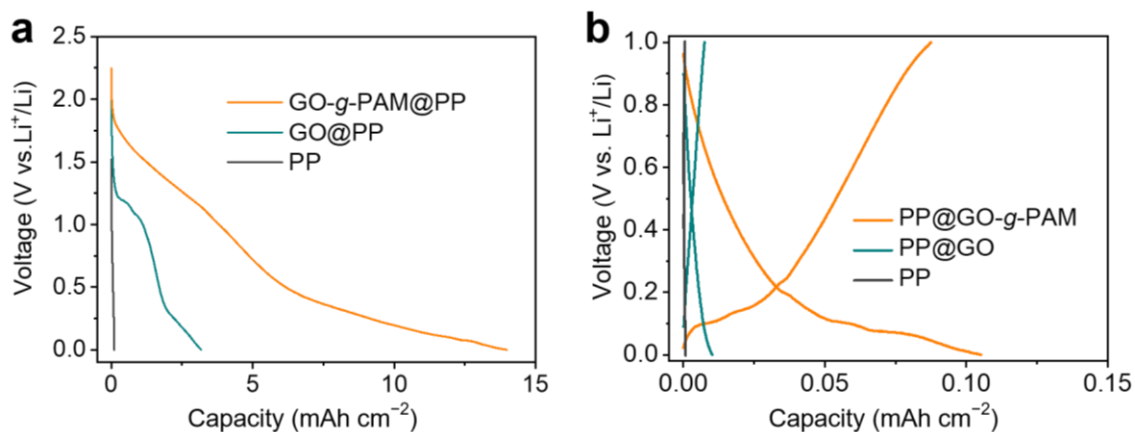

**Supplementary Figure 12 | Galvanostatic charge–discharge profiles of Li|Cu cells with PP, GO@PP, and GO-g-PAM@PP separators at the (a) 1<sup>st</sup> and (b) 5<sup>th</sup> cycles from 0 to 1 V at 50  $\mu$ A. The first discharge curve reveals that SEI films could be formed in the cell with the GO-g-PAM@PP separator.**

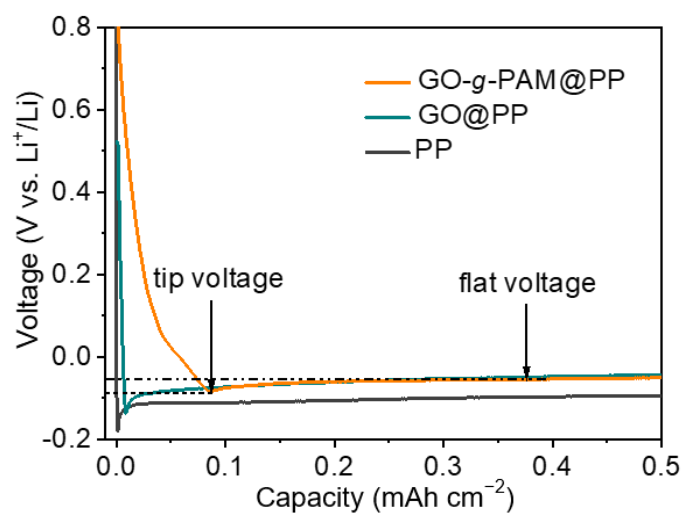

**Supplementary Figure 13 | Voltage profiles of Li plating on Cu foils with PP, GO@PP, and GO-g-PAM@PP separators at 0.5 mA cm<sup>-2</sup>.**

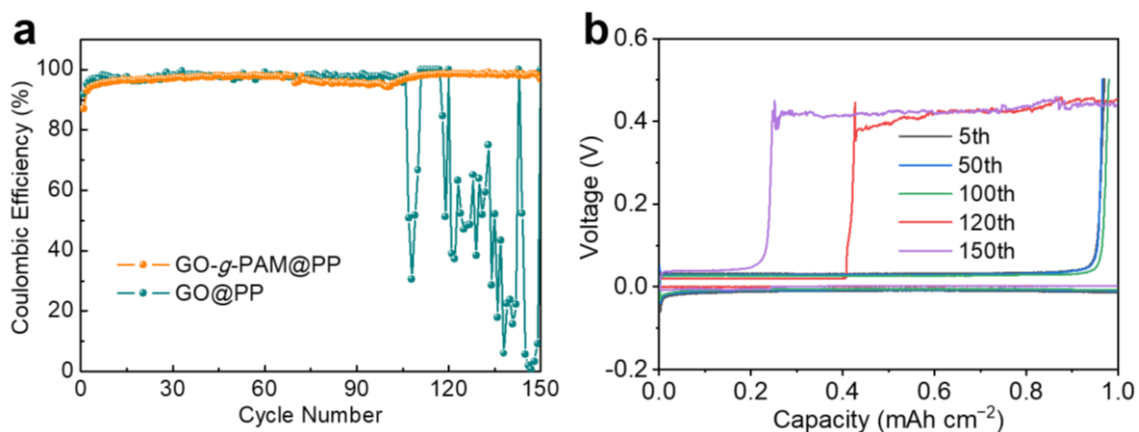

**Supplementary Figure 14 | Electrochemical performance of the Li|Cu cell with the GO@PP separator.** (a) Coulombic efficiencies of Li|Cu cells with GO-g-PAM@PP and GO@PP separators with a cycling capacity of 1 mAh cm<sup>-2</sup> at 0.5 mA cm<sup>-2</sup>. (b) Voltage profiles of Li plating/stripping processes in Li|Cu cells with GO@PP separators with a cycling capacity of 1 mAh cm<sup>-2</sup> at 0.5 mA cm<sup>-2</sup>.

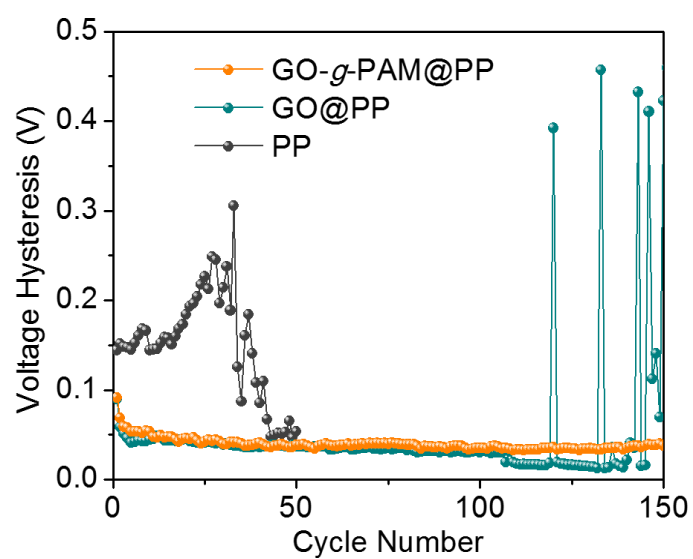

**Supplementary Figure 15 | Voltage hysteresis of Li metal plating/stripping in Li|Cu cells with GO-g-PAM@PP, GO@PP, and PP separators.**



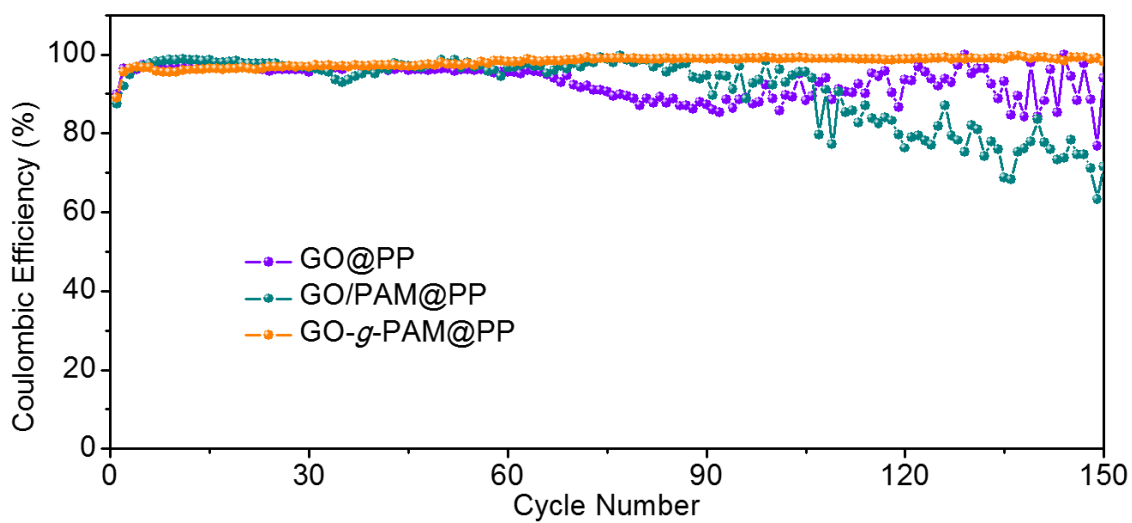

**Supplementary Figure 16 | Coulombic efficiencies of Li|Cu cells with GO@PP, GO/PAM@PP and GO-g-PAM@PP separators with a cycling capacity of 1.0 mAh cm<sup>-2</sup> at 1.0 mA cm<sup>-2</sup>.**

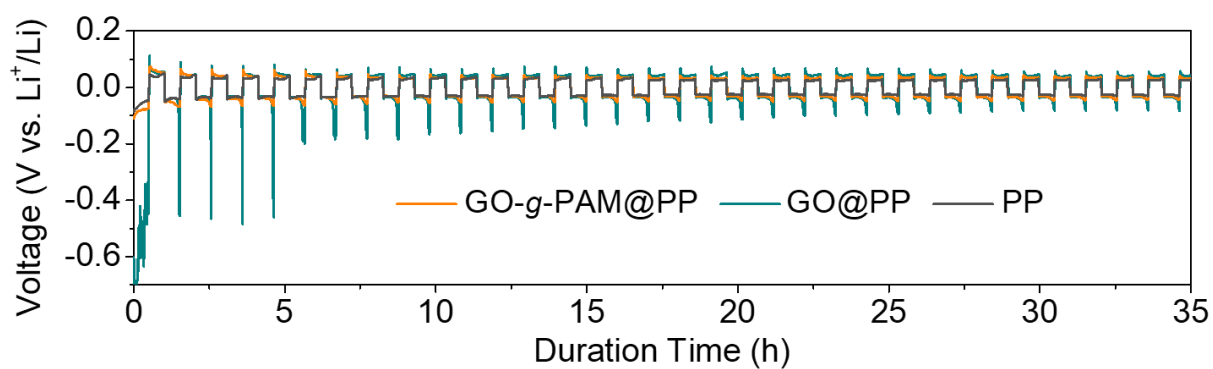

**Supplementary Figure 17 | Voltage–time profiles of Li plating/stripping processes with a cycling capacity of  $1 \text{ mAh cm}^{-2}$  at  $2 \text{ mA cm}^{-2}$  in symmetric Li|Li cells with GO-g-PAM@PP, GO@PP and PP separators.**

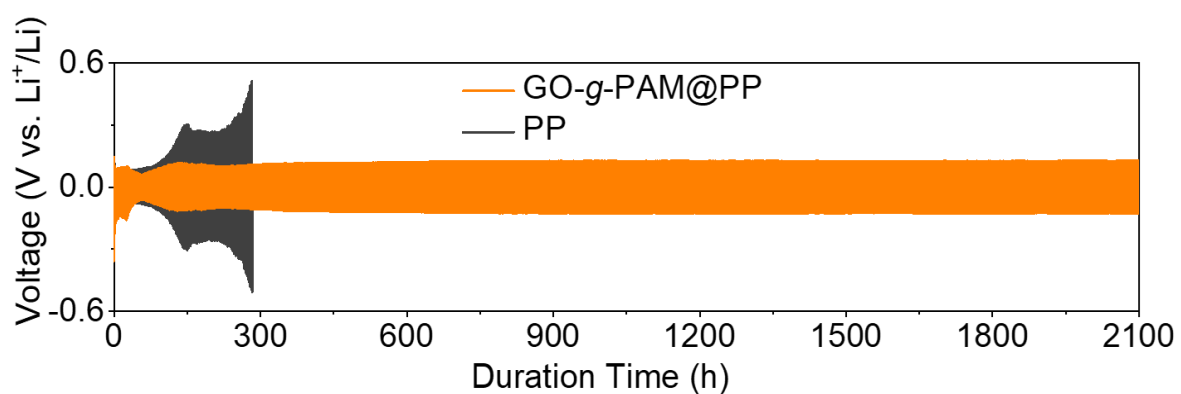

**Supplementary Figure 18 | Voltage–time profiles of Li plating/stripping processes with a cycling capacity of 1 mAh cm<sup>-2</sup> at 5 mA cm<sup>-2</sup> in symmetric Li|Li cells with GO-g-PAM@PP and PP separators.**

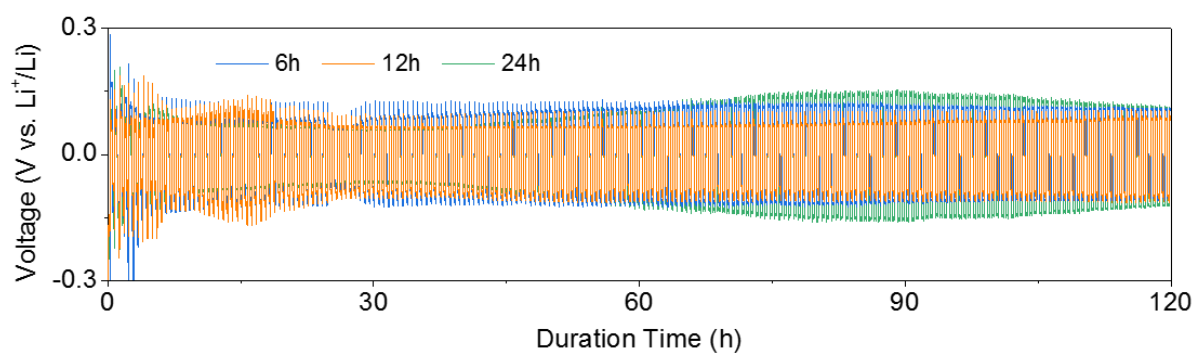

**Supplementary Figure 19 | Voltage–time profiles of Li plating/stripping processes with a cycling capacity of 5 mAh cm<sup>-2</sup> at 20 mA cm<sup>-2</sup> in symmetric Li|Li cells with PP separators coated with GO-g-PAM molecular brushes prepared with different polymerization times.**

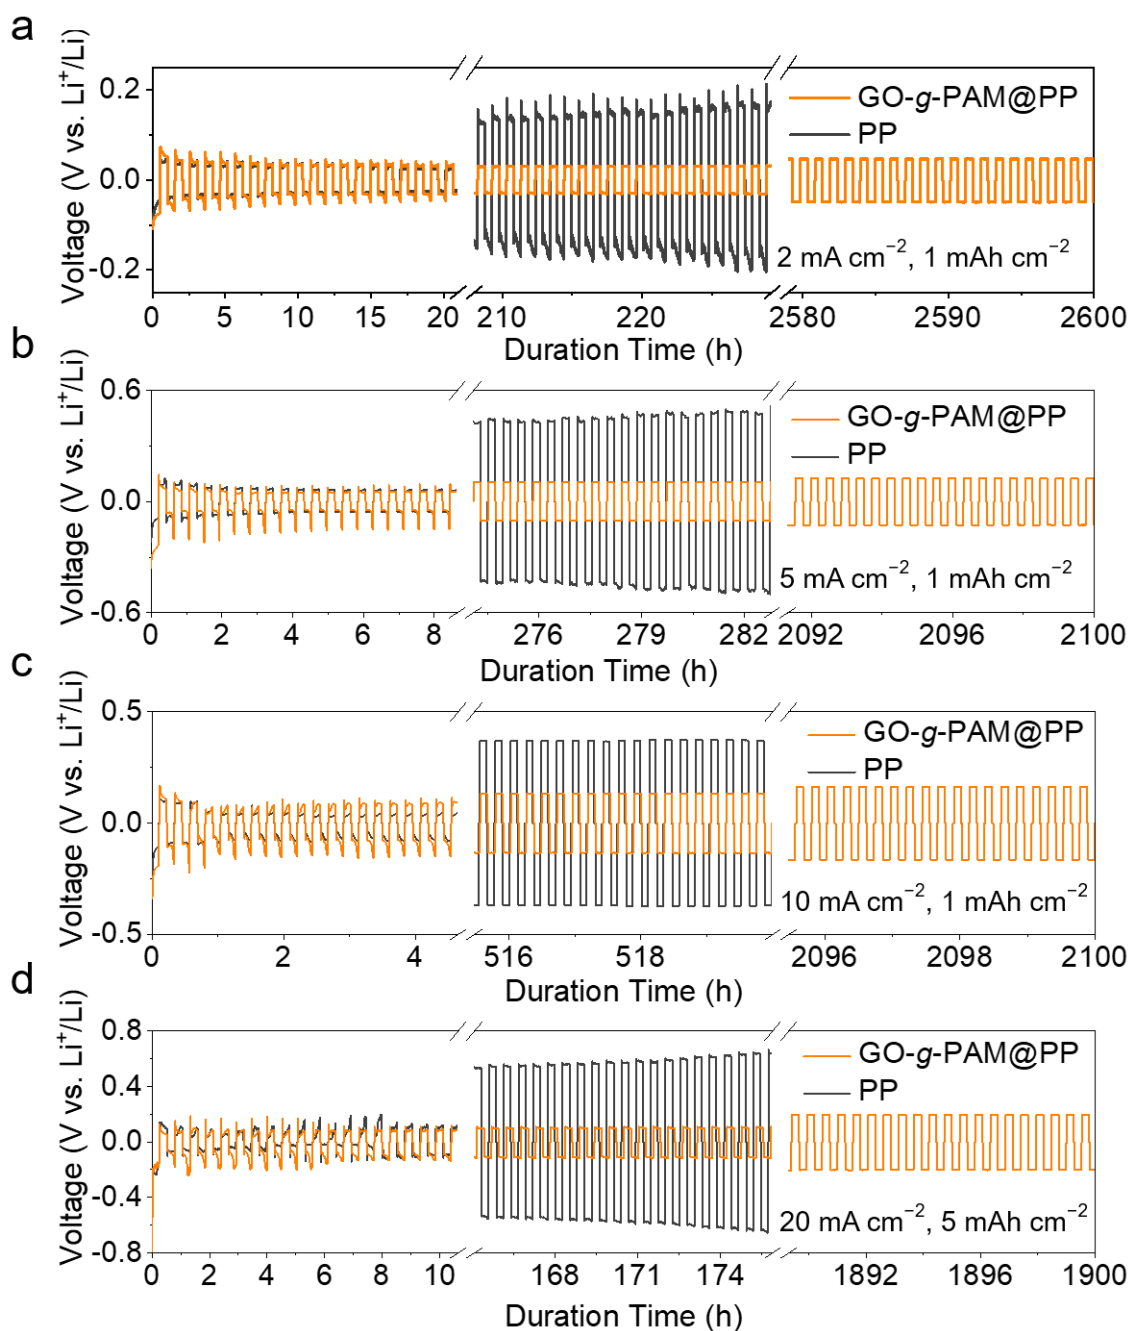

**Supplementary Figure 20 | Voltage–time profiles for the initial and last cycles of symmetric Li|Li cells with GO-g-PAM@PP and PP separators with a cycling capacity of (a-c) 1 and (d) 5 mAh cm<sup>-2</sup> at (a) 2, (b) 5, (c) 10, and (d) 20 mA cm<sup>-2</sup>.**

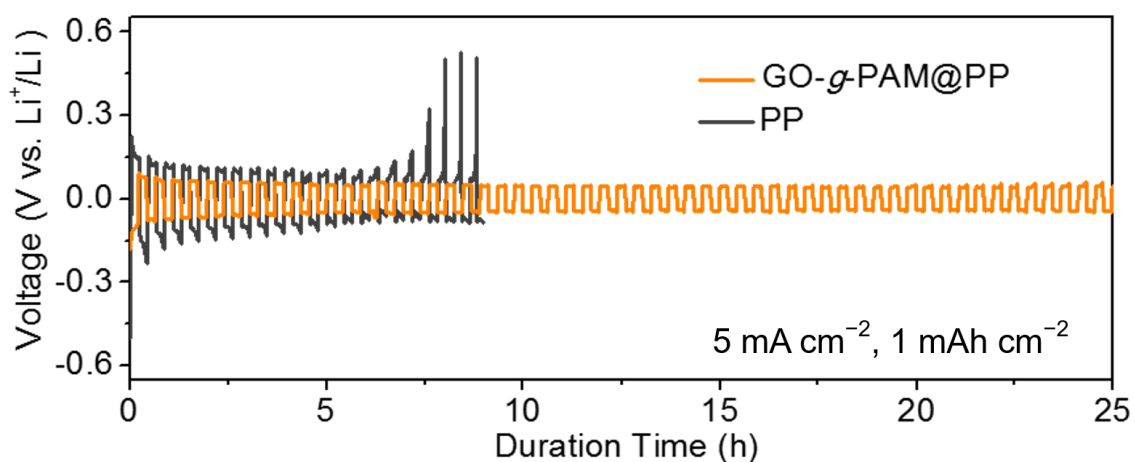

**Supplementary Figure 21 | Voltage–time profiles of Li plating/stripping processes with a cycling capacity of 1 mAh cm<sup>-2</sup> at 5 mA cm<sup>-2</sup> in Li|Li@Cu symmetric cells with PP and GO-g-PAM@PP separators.** The Li|Li@Cu symmetric cells were obtained by plating metallic Li onto Cu foils with a capacity of 3 mAh cm<sup>-2</sup> after cycling the Li|Cu cells from 0 to 1 V at 50  $\mu$ A for 5 cycles to stabilize the interface.

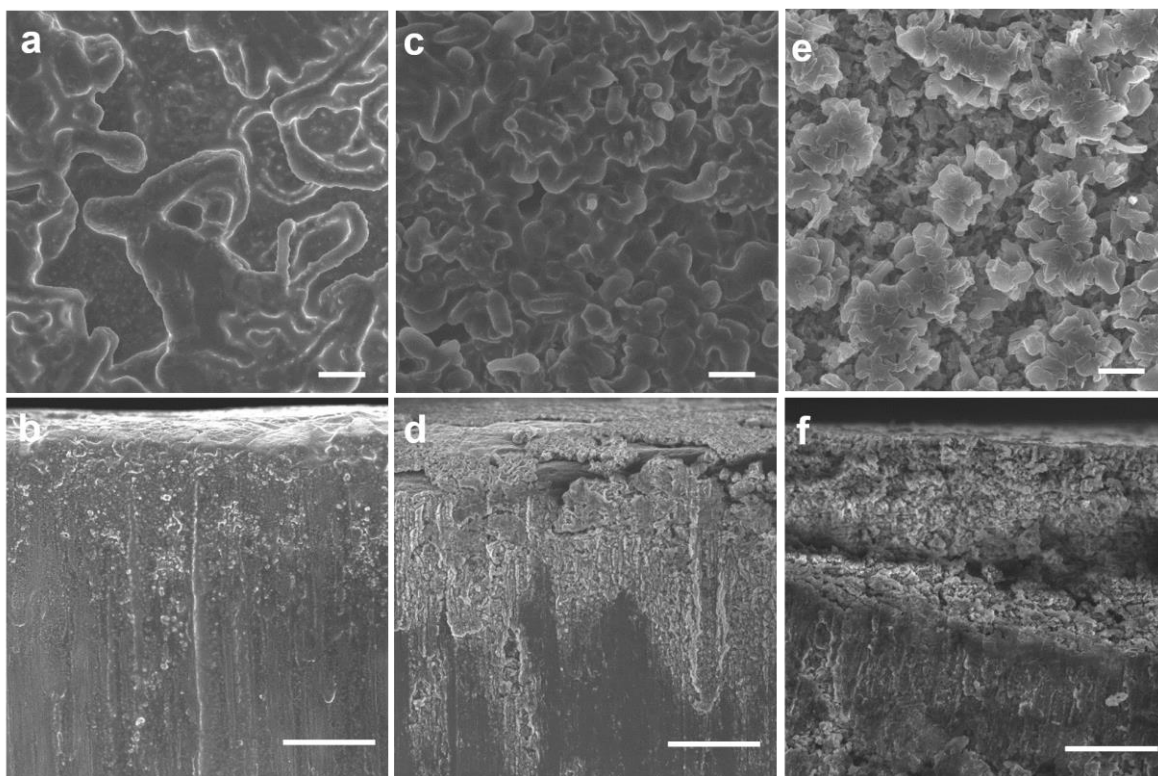

**Supplementary Figure 22 | (a, c, e) Top-view and (b,d,f) cross-section SEM images of Li metal anodes assembled with PP separators after (a, b) 1, (c, d) 10, and (e, f) 50 cycles. Scale bars, (a, c, e) 10  $\mu\text{m}$  and (b, d, f) 50  $\mu\text{m}$ .**

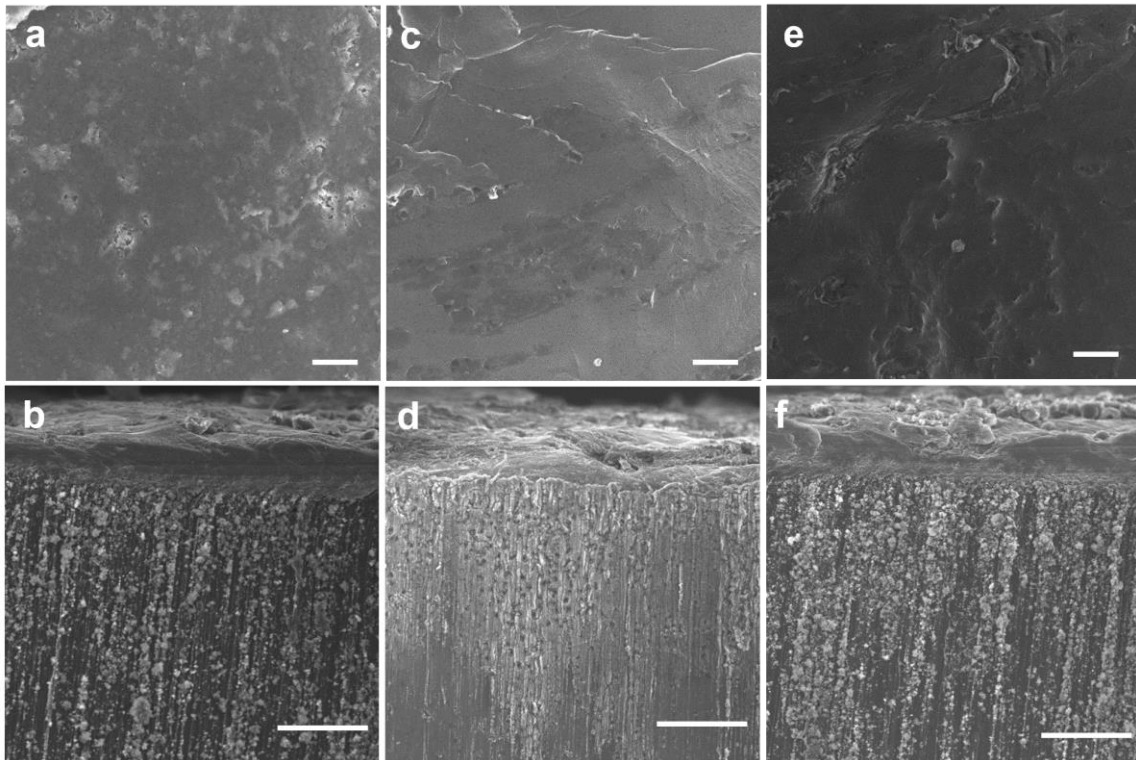

**Supplementary Figure 23 | (a, c, e) Top-view and (b,d,f) cross-section SEM images of Li metal anodes assembled with GO-g-PAM@PP separators after (a, b) 1, (c, d) 10, and (e, f) 50 cycles. Scale bars, (a, c, e) 10  $\mu\text{m}$  and (b, d, f) 50  $\mu\text{m}$ .**
